# Supplementary material for: Rice husk based nanocellulose scaffolds for highly efficient removal of heavy metal ions from contaminated water
Source: Royal Society of Chemistry journal article supplement (doi:10.1039/d0ew00545b), 2020-01-01
Supplement: d0ew00545b1.pdf [file d0ew00545b1.pdf]

## Supporting Information

### Rice Husk Based Nanocellulose Scaffold for Highly Efficient Removal of Heavy Metal Ions from Contaminated Water

Chengbo Zhan<sup>1,2</sup>, Priyanka R. Sharma<sup>2</sup>, Hongrui He<sup>2</sup>, Sunil K. Sharma<sup>2</sup>,

Alexis McCauley-Pearl<sup>3</sup>, Ruifu Wang<sup>1</sup>, Benjamin S. Hsiao<sup>2\*</sup>

<sup>1</sup> Space Institute of Southern China, Shenzhen 518117, China

<sup>2</sup> Department of Chemistry, Stony Brook University, Stony Brook, NY11794-3400, United  
States

<sup>3</sup> Smithtown High School East, Saint James, NY 11780, United States

\* Corresponding author E-mail: benjamin.hsiao@stonybrook.edu; Tel: +1(631)632-7793

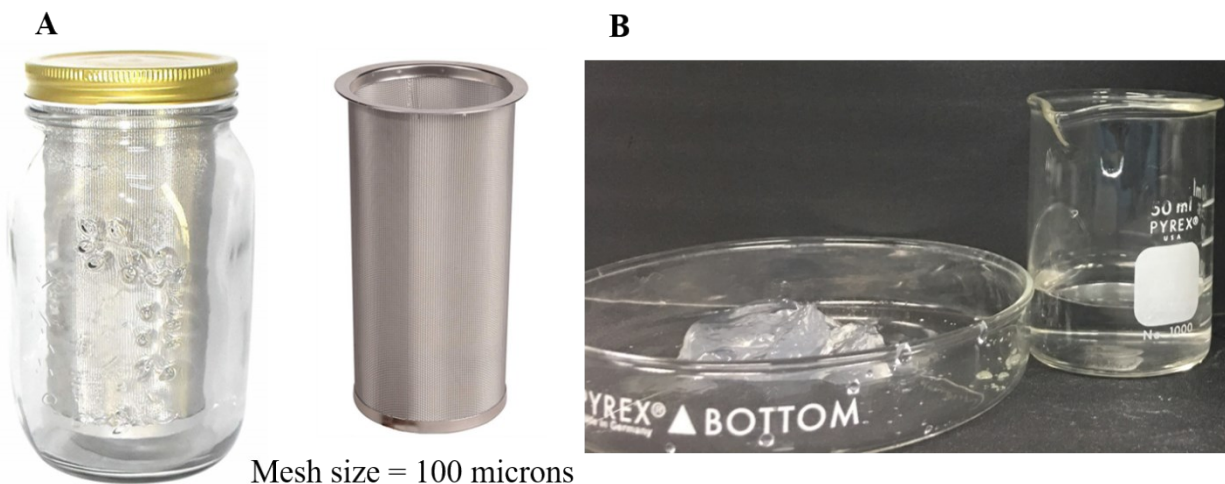

1

2 **Figure S1.** Separation of RHCNF gel after the metal ion adsorption. (A) Separation was carried  
 3 out by a commercial coffee filter brewer with 100-micron mesh size. (B) Separated gel (induced  
 4 by RHCNF and metal ion interactions) and permeant.

5

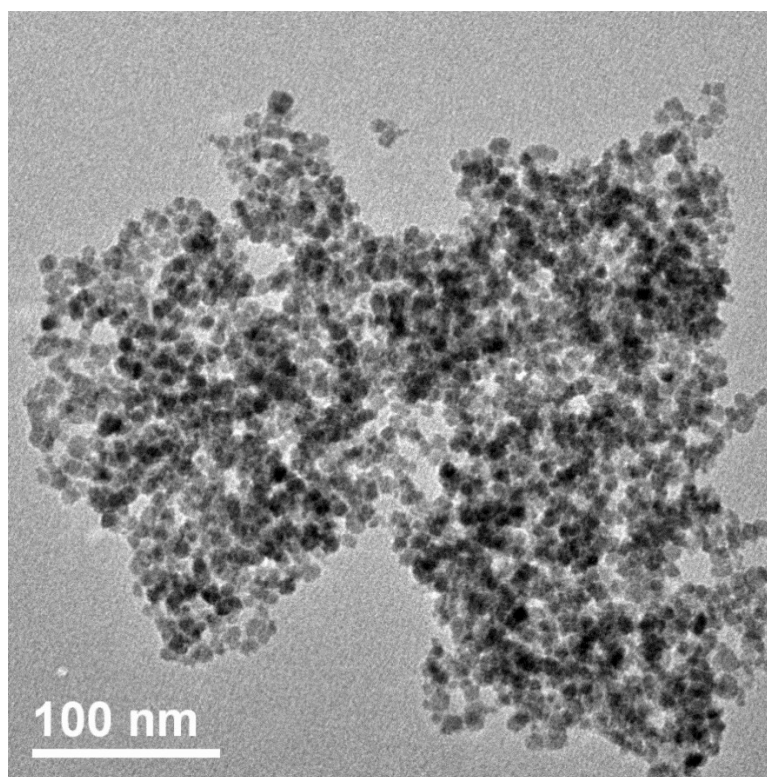

6

7 **Figure S2.** TEM image of magnetic nanoparticles prepared by the co-precipitation method.

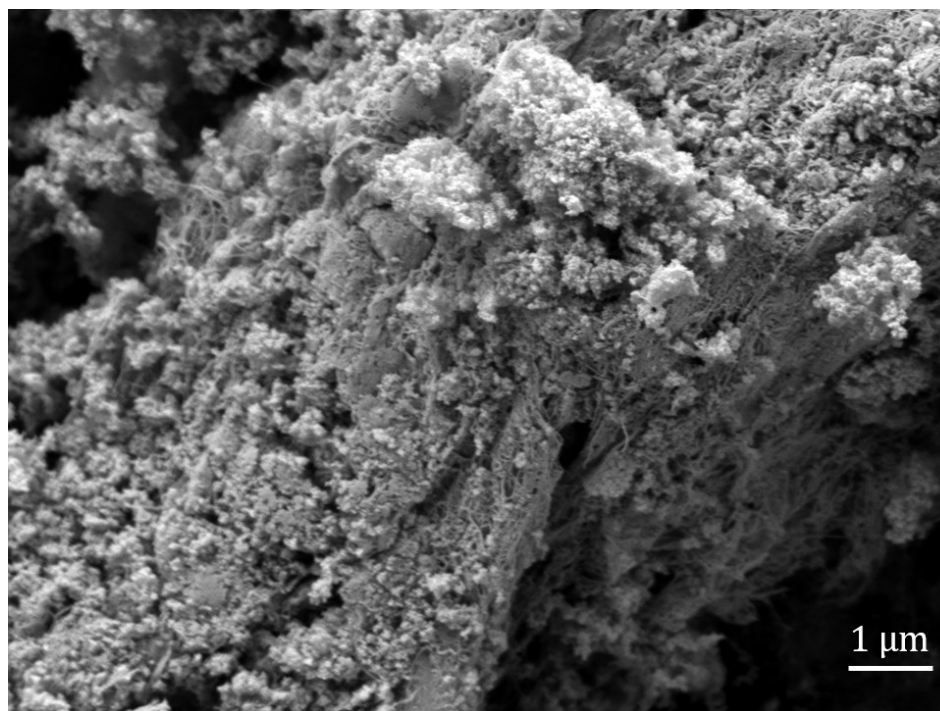

1

2 **Figure S3.** SEM image of Mag-RHCNF composite. Magnetic particles were visible as the granular  
 3 particles adhered to the porous nanocellulose scaffold.

4

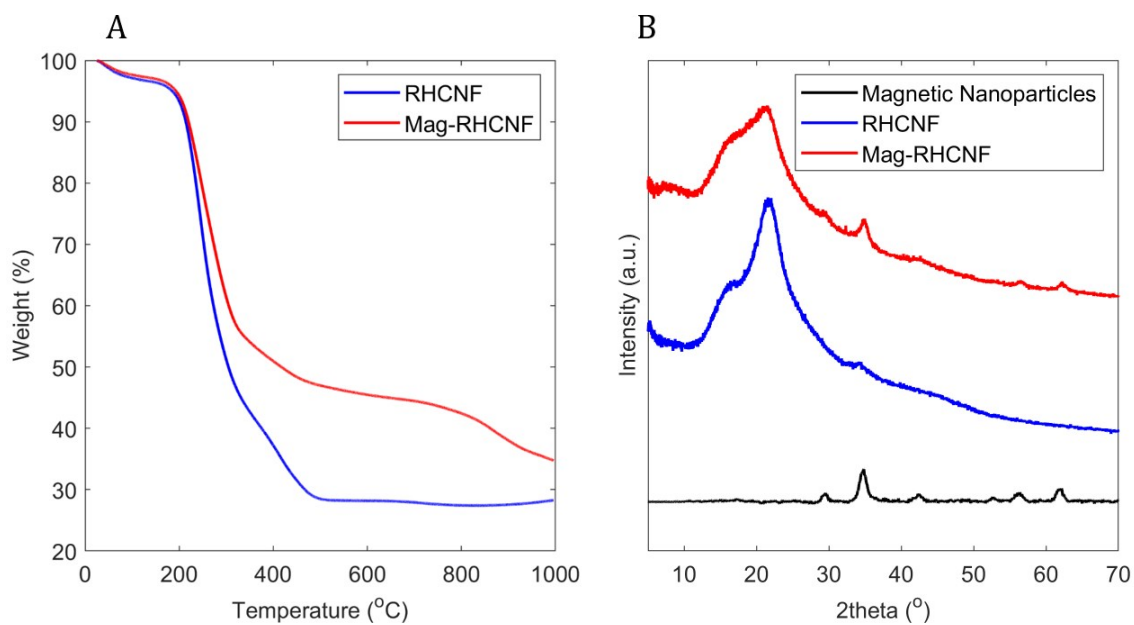

5

6 **Figure S4.** (A) TGA and (B) XRD profiles of RHCNF and Mag-RHCNF samples.

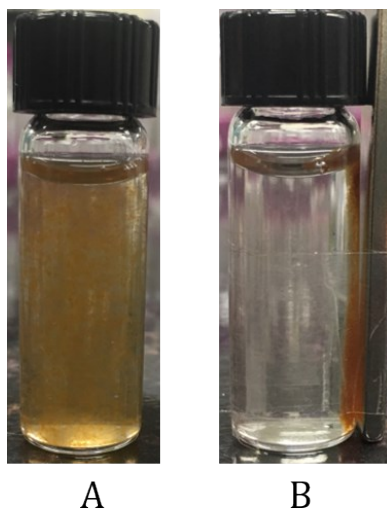

1

2 **Figure S5.** Demonstration of magnetic separation using Mag-RHCNF. (A) The initial suspension  
3 of Mag-RHCNF, (B) a magnet was placed on the right side of the sample vial to attract Mag-  
4 RHCNF.

5

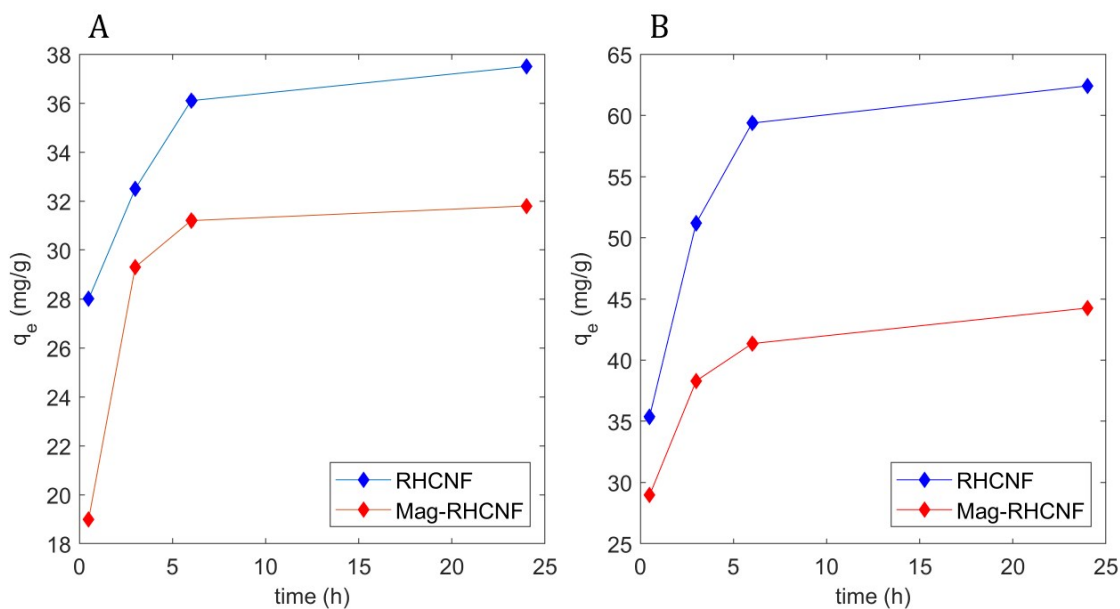

6

7 **Figure S6.** The adsorption kinetics of solid RHCNF and Mag-RHCNF samples for (A)  $\text{LaCl}_3$  and  
8 (B)  $\text{Pb}(\text{OAc})_2$  adsorption. All experiments were equilibrated for 24 h (i.e., the static adsorption test  
9 was carried out for 24 h).

1 **Table S1.** The adsorption capacity of the RHCNF suspension for mixed solutions of La(III) and  
2 Pb(II). The measurements were conducted at pH = 7, room temperature. The dosage of 0.12 wt%  
3 RHCHF suspension was 2 mL.

| Original La(III)<br>Concentration (ppm) | Original Pb(II)<br>Concentration (ppm) | Experimental<br>adsorption capacity<br>for La(III) ( $q_e$ , mg/g) | Experimental<br>adsorption capacity<br>for Pb(II) ( $q_e$ , mg/g) |
|-----------------------------------------|----------------------------------------|--------------------------------------------------------------------|-------------------------------------------------------------------|
| 50                                      | 50                                     | 17.7                                                               | 19.2                                                              |
| 125                                     | 125                                    | 23.1                                                               | 51.3                                                              |
| 250                                     | 250                                    | 36.7                                                               | 69.2                                                              |
| 500                                     | 500                                    | 39.2                                                               | 104.1                                                             |

4
